# Supplementary material
Source: PubMed Central journal article supplement (PMC3125694)
Supplement: NIHMS286079-supplement-1.pdf [file NIHMS286079-supplement-1.pdf]

## SUPPLEMENTAL MATERIAL

### Supplemental Methods

To assess how representative our study population (N=31) was relative to our hospital stroke population (N=2057) over the 2.5 year enrollment time period, we compared baseline characteristics of both groups (Table). Wilcoxon rank sum test was utilized for group comparisons of continuous variables (age, NIHSS, and door-to-needle time). Fisher's exact test was utilized for group comparisons of binary variables (gender, race, and symptomatic hemorrhage rate).

**Supplemental Table.** Baseline Characteristics, Door-to-needle time, and symptomatic intracerebral hemorrhage (ICH) rate comparing the Study Cohort to the Hospital Population.

|                                            | tPA-treated<br>1/1/08-5/31/10 |                                 | Non-tPA-treated<br>1/1/08-5/31/10 |                                  |
|--------------------------------------------|-------------------------------|---------------------------------|-----------------------------------|----------------------------------|
|                                            | Study<br>Cohort<br>N=23       | Hospital<br>Population<br>N=120 | Study<br>Cohort<br>N=8            | Hospital<br>Population<br>N=1937 |
| <b>Age (years)</b> , mean±SD               | 60±12                         | 65±17                           | 63±18                             | 64±16                            |
| <b>NIHSS (points)</b> , mean±SD            | 15±6                          | 12±7                            | 16±5                              | 8±8*                             |
| <b>Female (%)</b>                          | 39                            | 51                              | 62                                | 52                               |
| <b>Black (%)</b>                           | 30                            | 40                              | 38                                | 45                               |
| <b>Door-to-needle time (min)</b> , mean±SD | 51±14                         | 60 ±18*                         | --                                | --                               |
| <b>Symptomatic ICH Rate (%)</b>            | 4.4                           | 2.5                             | --                                | --                               |

\*p< 0.05 for significant difference between the Study Cohort and the Hospital Population.

### Supplemental References.

None.
